# Supplementary material for: Human-driven sea-level rise has tripled the frequency of coastal sea-level extremes since 1900
Source: Research Square preprint supplement (doi:10.21203/rs.3.rs-7491013/v1), 2025-11-07
Supplement: Supplementary file 1 [file c07cd298eba543da86d7fae6.xlsx]

## Sheet: Table 1 - MSL Trends 1900-2005
			Tide Gauge	Period			Case 1										Case 2		Case 3
							Trend [mmyr-1]
							OBS			HIST			ANT	NAT	TWS	VLM	ANT	NAT	ANT	NAT
			QUEQUEN	1918	-	1982	0.854436	±	0.173751	0.798072	±	0.368622	0.7374	1.09653	-0.287635	-0.748054	0.894831	0.938929	1.05226	0.781326
			BUENOS AIRES	1905	-	1987	1.56674	±	0.146708	1.82872	±	0.542257	0.789845	1.0988	-0.173857	0.114056	0.963347	0.925174	1.13685	0.751546
			TAKORADI	1930	-	1991	-2.56745	±	0.215254	-2.42957	±	0.473387	0.674601	0.778965	-0.203998	-3.67916	0.751381	0.7022	0.828161	0.625435
			LYTTELTON II	1924	-	2000	2.34513	±	0.190137	1.7596	±	0.362415	1.09861	0.719363	-0.358272	0.299843	1.20327	0.614751	1.30794	0.51014
			WELLINGTON HARBOUR	1945	-	2005	2.30566	±	0.106713	1.75885	±	0.408226	1.48697	0.167215	-0.385235	0.489905	1.49402	0.160161	1.50108	0.153107
			WELLINGTON II	1945	-	2000	2.01049	±	0.159184	1.5648	±	0.416421	1.3526	0.231866	-0.45992	0.440247	1.36246	0.222005	1.37232	0.212143
			AUCKLAND II	1904	-	1998	1.25639	±	0.132846	0.666425	±	0.338241	0.916398	1.00082	-0.298372	-0.95244	1.07344	0.843794	1.23049	0.68677
			PORT ADELAIDE (OUTER HARBOR)	1941	-	2005	2.14007	±	0.102161	2.08063	±	0.422264	0.990999	0.454721	-0.384134	1.01904	1.00558	0.440139	1.02017	0.425557
			SYDNEY, FORT DENISON 2	1915	-	2005	0.887986	±	0.144572	1.01822	±	0.572965	1.17788	0.777996	-0.292094	-0.645583	1.28808	0.667817	1.39828	0.557639
			SYDNEY, FORT DENISON	1900	-	1993	0.716905	±	0.0925798	0.859783	±	0.419577	0.856118	1.10024	-0.24587	-0.850723	1.02652	0.929856	1.19692	0.759473
			PORT PIRIE	1941	-	2005	0.225166	±	0.233457	0.640402	±	0.473272	0.940866	0.483043	-0.379478	-0.404028	0.959367	0.464542	0.977868	0.44604
			NEWCASTLE III	1926	-	1988	2.17193	±	0.266227	1.81383	±	0.519886	1.01674	0.850906	-0.37916	0.325318	1.1276	0.740069	1.23846	0.629231
			FREMANTLE	1901	-	2005	1.40592	±	0.41852	0.494375	±	0.495028	0.743333	0.910081	-0.266859	-0.892192	0.872336	0.78109	1.00134	0.6521
			PAGO PAGO	1949	-	2005	2.0524	±	0.188851	2.16324	±	0.349084	1.04433	0.616783	-0.41588	0.918006	1.04534	0.615774	1.04635	0.614765
			KO TAPHAO NOI	1940	-	2005	0.421347	±	0.278372	-0.0800644	±	0.983317	0.786959	0.399067	-0.351409	-0.914686	0.807363	0.378668	0.827768	0.358268
			COCHIN (WILLINGDON IS.)	1939	-	2003	1.3858	±	1.77597	0.847127	±	0.444162	0.838334	0.448951	-0.443867	0.00369285	0.866079	0.421222	0.893824	0.393494
			KO LAK	1940	-	2005	-0.430185	±	0.150739	-0.493448	±	0.340636	0.80913	0.368098	-0.327787	-1.34289	0.829771	0.347461	0.850413	0.326825
			KO SICHANG	1940	-	2002	0.790264	±	0.19078	0.661736	±	0.374995	0.785576	0.324281	-0.357785	-0.0903494	0.809108	0.300762	0.83264	0.277242
			LEGASPI, ALBAY	1949	-	2005	5.26954	±	0.167647	5.01466	±	0.557641	1.01765	0.39499	-0.347606	3.94963	1.01851	0.394127	1.01937	0.393264
			FORT PHRACHULA CHOMKLAO (POM PHRACHUN)	1940	-	2005	14.7269	±	0.32962	14.6904	±	0.457663	0.833852	0.341996	-0.328785	13.8433	0.855391	0.32046	0.87693	0.298924
			MANILA, S. HARBOR	1902	-	2005	6.72713	±	0.13323	6.51471	±	0.309326	0.770791	0.971425	-0.240278	5.01275	0.910897	0.831345	1.051	0.691265
			VISAKHAPATNAM	1937	-	2005	0.781872	±	0.235381	0.0968985	±	0.310183	0.629489	0.405561	-0.399752	-0.538441	0.664464	0.370628	0.699438	0.335694
			MUMBAI / BOMBAY (APOLLO BANDAR)	1900	-	1993	0.825806	±	0.197087	0.677333	±	0.315268	0.496747	0.858696	-0.31294	-0.365198	0.641394	0.714078	0.78604	0.569459
			MACAU	1925	-	1982	0.262962	±	0.178421	-0.0833317	±	0.365298	0.425641	0.898206	-0.220442	-1.1868	0.547442	0.776472	0.669242	0.654738
			GARDEN REACH	1932	-	2005	7.21739	±	0.259245	6.23826	±	0.526135	0.472041	0.398315	-0.338494	5.7064	0.519653	0.350704	0.567266	0.303094
			BALBOA	1908	-	2005	1.60083	±	0.185728	1.50152	±	0.538613	0.701715	0.891659	-0.205212	0.113367	0.81764	0.775728	0.933566	0.659798
			SAN DIEGO (QUARANTINE STATION)	1906	-	2005	2.09823	±	0.210237	2.09505	±	0.503454	0.669823	0.850667	-0.311761	0.886359	0.770948	0.749506	0.872076	0.648348
			LA JOLLA (SCRIPPS PIER)	1925	-	2005	2.06293	±	0.263319	2.01595	±	0.44214	0.756011	0.699293	-0.369446	0.930146	0.817464	0.637788	0.878917	0.576283
			LOS ANGELES	1924	-	2005	0.873637	±	0.206145	0.599211	±	0.547457	0.796829	0.706296	-0.3642	-0.539701	0.85724	0.645872	0.91765	0.585448
			SANTA MONICA (MUNICIPAL PIER)	1933	-	2005	1.48896	±	0.17691	1.39641	±	0.368169	0.838572	0.579388	-0.410594	0.389039	0.873439	0.544528	0.908307	0.509668
			PORT SAN LUIS	1946	-	2005	0.816163	±	0.196238	0.563368	±	0.389204	0.924105	0.413124	-0.551398	-0.222457	0.928798	0.408425	0.933491	0.403725
			ALAMEDA (NAVAL AIR STATION)	1940	-	2005	0.790869	±	0.222353	0.641578	±	0.50932	0.889912	0.403884	-0.308829	-0.343338	0.905074	0.388671	0.920236	0.373458
			SAN FRANCISCO	1900	-	2005	1.96885	±	0.141547	2.20396	±	0.347254	0.681232	0.832321	-0.195707	0.886207	0.78095	0.732511	0.880668	0.632702
			CRESCENT CITY	1933	-	2005	-0.610375	±	0.213072	-0.632722	±	0.598476	0.830951	0.449714	-0.203218	-1.71014	0.861654	0.418982	0.892357	0.388251
			ASTORIA (TONGUE POINT)	1925	-	2005	-0.364779	±	0.266581	-0.332232	±	0.416599	0.655706	0.420904	-0.140274	-1.26867	0.691742	0.384966	0.727777	0.349028
			SEATTLE	1900	-	2005	2.04594	±	0.150173	2.17307	±	0.365489	0.523503	0.489845	-0.0931863	1.25282	0.584772	0.42866	0.646073	0.367449
			NEAH BAY	1935	-	2005	-1.60688	±	0.156957	-1.49929	±	0.428544	0.645092	0.27169	-0.145944	-2.26988	0.661401	0.255141	0.677709	0.238593
			VICTORIA	1910	-	2005	0.691141	±	0.137801	0.766211	±	0.388168	0.516324	0.490342	-0.103713	-0.136545	0.568371	0.438097	0.620432	0.385853
			FRIDAY HARBOR (OCEAN. LABS.)	1934	-	2005	1.06864	±	0.346369	1.07718	±	0.916332	0.655837	0.292017	-0.146855	0.276508	0.67355	0.273974	0.691263	0.255932
			TOFINO	1910	-	2005	-1.45747	±	0.275867	-1.06067	±	0.870464	0.544274	0.396605	-0.123012	-1.87806	0.584435	0.355968	0.624595	0.315331
			VANCOUVER	1911	-	2005	0.299219	±	0.408869	0.575033	±	0.968944	0.486117	0.482565	-0.109248	-0.284298	0.534655	0.433924	0.583192	0.385283
			POINT ATKINSON	1915	-	2005	0.903865	±	0.422145	1.06483	±	0.487218	0.494276	0.469356	-0.114636	0.215948	0.53563	0.427891	0.576984	0.386425
			PRINCE RUPERT	1909	-	2005	1.1489	±	0.143506	1.5475	±	0.429283	0.520541	0.143778	-0.128447	1.01221	0.529185	0.134548	0.537828	0.125225
			KETCHIKAN	1919	-	2005	-0.177366	±	0.33457	0.0849572	±	0.583289	0.433424	0.0751335	-0.16799	-0.254796	0.411958	0.095786	0.390485	0.116451
			SITKA	1938	-	2005	-2.10966	±	0.276603	-1.5216	±	0.483213	0.341952	-0.256655	-0.228038	-1.37828	0.30898	-0.224265	0.276008	-0.192029
			JUNEAU	1936	-	2005	-12.9425	±	0.313373	-12.3189	±	0.513039	0.34764	-0.233517	-0.225349	-12.2069	0.311409	-0.19807	0.275177	-0.162623
			YAKUTAT	1940	-	2005	-6.32828	±	0.199971	-4.61647	±	0.497269	0.353528	-0.252887	-0.259202	-4.45746	0.327331	-0.227141	0.301134	-0.201395
			SANTA CRUZ DE TENERIFE I	1927	-	1989	1.62214	±	0.148166	1.68927	±	0.429283	0.644966	0.600299	-0.341543	0.785471	0.724446	0.520893	0.803926	0.441486
			CEUTA	1945	-	2005	0.396902	±	0.230935	0.465065	±	0.450884	0.806124	0.283529	-0.233946	-0.390642	0.81158	0.278073	0.817037	0.272617
			TARIFA	1944	-	2005	0.377119	±	0.212662	0.319325	±	0.611937	0.802025	0.303647	-0.211363	-0.574988	0.809841	0.295836	0.817657	0.288024
			LAGOS	1909	-	1987	1.57137	±	0.219725	1.73498	±	0.409822	0.608059	0.840184	-0.218409	0.505124	0.721204	0.727057	0.834349	0.61393
			CASCAIS	1900	-	1993	1.60453	±	0.156718	1.62245	±	0.415027	0.561796	0.856395	-0.172725	0.376931	0.672663	0.745585	0.78353	0.634774
			WOODS HOLE (OCEAN. INST.)	1933	-	2005	2.56684	±	0.21058	2.18428	±	0.50507	0.897883	0.334991	-0.0702695	1.02169	0.928049	0.304809	0.958215	0.274626
			VIGO	1944	-	2004	2.6	±	0.243521	2.46075	±	0.338819	0.623772	0.303118	-0.223238	1.75709	0.630125	0.296773	0.636477	0.290427
			BOSTON	1921	-	2005	2.62025	±	0.144236	2.36314	±	0.415998	0.789002	0.577581	-0.00345408	0.999995	0.841395	0.525204	0.893788	0.472828
			LA CORUNA I	1944	-	2005	2.31208	±	0.199041	2.05826	±	0.291435	0.686185	0.326316	-0.24249	1.28825	0.692539	0.319961	0.698893	0.313607
			SANTANDER I	1944	-	2005	2.10274	±	0.287166	1.93034	±	0.311316	0.643313	0.393423	-0.201446	1.09505	0.64949	0.387249	0.655667	0.381074
			PORTLAND (MAINE)	1912	-	2005	1.81854	±	0.338275	1.81345	±	0.592892	0.766086	0.741546	-0.000774106	0.30659	0.833243	0.674394	0.900401	0.607242
			EASTPORT	1930	-	2005	2.0433	±	0.549709	1.71849	±	0.36875	0.79842	0.429885	-0.0284575	0.51865	0.832149	0.39615	0.865878	0.362415
			SAINT JOHN, N.B.	1906	-	2003	2.27677	±	1.04768	2.43388	±	0.52583	0.694076	0.82767	-0.0144996	0.9266	0.766259	0.755524	0.838441	0.683378
			CHARLOTTETOWN	1912	-	2005	2.98842	±	0.245306	2.86813	±	0.571484	0.648397	0.5142	0.051082	1.65447	0.687288	0.475285	0.726178	0.43637
			BREST	1900	-	2005	1.40039	±	0.259371	1.89	±	0.401265	0.695804	0.656085	-0.168284	0.706321	0.767984	0.583976	0.840162	0.511867
			NEWLYN	1916	-	2005	1.71635	±	0.324028	2.44246	±	0.407775	0.644848	0.628088	-0.198212	1.36771	0.690503	0.582457	0.736158	0.536825
			OOSTENDE	1937	-	2005	1.74616	±	0.159589	1.41857	±	0.497557	0.680061	0.375368	-0.189592	0.552724	0.689683	0.365752	0.699306	0.356135
			VLISSINGEN	1900	-	2005	2.09059	±	0.430211	2.17148	±	0.592436	0.6541	0.65486	-0.149667	1.01203	0.712076	0.597045	0.770052	0.53923
			SHEERNESS	1900	-	2005	2.15848	±	0.215214	2.43531	±	0.576061	0.695876	0.673605	-0.149213	1.21491	0.759714	0.609899	0.823551	0.546194
			MAASSLUIS	1900	-	2005	1.65199	±	0.333624	1.7187	±	0.680249	0.670643	0.662372	-0.145671	0.531208	0.729755	0.603407	0.788869	0.544443
			HOEK VAN HOLLAND	1900	-	2005	2.25123	±	0.295412	2.31794	±	0.622708	0.670643	0.662372	-0.145671	1.13045	0.729755	0.603407	0.788869	0.544443
			IJMUIDEN	1900	-	2005	2.21403	±	0.308168	2.2498	±	0.524829	0.670643	0.662372	-0.145671	1.06231	0.729755	0.603407	0.788869	0.544443
			DEN HELDER	1900	-	2005	1.53101	±	0.179663	1.56678	±	0.429283	0.670643	0.662372	-0.145671	0.379289	0.729755	0.603407	0.788869	0.544443
			HARLINGEN	1900	-	2005	1.18322	±	2.29587	1.3022	±	0.404753	0.650832	0.661375	-0.149049	0.13892	0.706353	0.605981	0.761874	0.550586
			HOLYHEAD	1938	-	2004	2.25379	±	0.267691	2.21356	±	0.748029	0.535131	0.396416	-0.219725	1.50175	0.54535	0.386184	0.555568	0.375952
			DELFZIJL	1900	-	2005	1.90594	±	0.190144	1.68213	±	0.670694	0.67414	0.682174	-0.14427	0.469952	0.727097	0.629349	0.780055	0.576523
			DUBLIN	1938	-	2005	0.892945	±	0.24801	1.08719	±	0.452761	0.558487	0.428319	-0.227587	0.327979	0.568839	0.417958	0.579192	0.407596
			WEST-TERSCHELLING	1921	-	2005	0.868455	±	0.262883	0.841026	±	0.539651	0.593186	0.641471	-0.175793	-0.21794	0.628695	0.606065	0.664204	0.57066
			WISMAR 2	1900	-	2005	1.41907	±	0.30023	1.48081	±	0.739334	0.6945	0.678607	-0.140708	0.248308	0.747621	0.625592	0.800742	0.572577
			TRAVEMUNDE	1900	-	2005	1.66295	±	0.241104	1.72469	±	0.729242	0.6945	0.678607	-0.140708	0.492182	0.747621	0.625592	0.800742	0.572577
			KIEL-HOLTENAU	1955	-	2005	1.21759	±	0.207043	0.746473	±	0.727126	0.972685	0.400197	-0.156274	-0.470139	0.970777	0.40211	0.968868	0.404022
			GEDSER	1900	-	2005	1.11448	±	0.496889	0.953422	±	0.400125	0.693081	0.683884	-0.138923	-0.284721	0.746238	0.630828	0.799394	0.577772
			NORTH SHIELDS	1900	-	2005	1.94839	±	0.929067	1.90265	±	0.617094	0.647243	0.62057	-0.150466	0.785026	0.68899	0.579098	0.730736	0.537626
			SLIPSHAVN	1900	-	2005	1.00972	±	0.250954	0.802429	±	0.589916	0.718344	0.619716	-0.117665	-0.418203	0.759071	0.579225	0.799799	0.538735
			KORSOR	1900	-	2005	0.860066	±	0.247291	0.69373	±	0.707572	0.705432	0.619711	-0.113618	-0.51802	0.746811	0.578557	0.788189	0.537403
			ESBJERG	1900	-	2005	1.11899	±	0.265733	0.906675	±	0.704116	0.720892	0.639557	-0.135696	-0.318195	0.770395	0.590171	0.819898	0.540786
			FREDERICIA	1900	-	2005	1.02531	±	0.273436	0.576351	±	0.70979	0.721158	0.634745	-0.136846	-0.642819	0.770627	0.585389	0.820095	0.536033
			HORNBAEK	1900	-	2005	0.328395	±	0.241323	-0.309426	±	0.583607	0.718652	0.615123	-0.115759	-1.52765	0.75998	0.574005	0.801308	0.532887
			AARHUS	1900	-	2004	0.501306	±	0.360846	-0.0998115	±	0.569087	0.698407	0.640774	-0.118827	-1.32042	0.740438	0.598996	0.782469	0.557218
			VARBERG	1900	-	1981	-0.954091	±	0.344705	-1.09054	±	0.814993	0.737945	0.711365	-0.11792	-2.42218	0.79677	0.652792	0.855595	0.594219
			ABERDEEN I	1932	-	2005	0.876172	±	0.334093	0.727552	±	0.702941	0.71899	0.444332	-0.201228	-0.234681	0.733436	0.430026	0.747882	0.415719
			ABERDEEN II	1900	-	1965	0.92718	±	0.243503	1.22082	±	0.639656	0.585705	0.702567	-0.0724282	0.00462178	0.654244	0.634386	0.722784	0.566204
			FREDERIKSHAVN	1900	-	2005	0.138048	±	0.266121	-0.286229	±	0.551362	0.71029	0.616763	-0.1145	-1.49902	0.751211	0.576077	0.792131	0.535392
			HIRTSHALS	1900	-	2005	-0.269522	±	0.235201	-0.367537	±	0.655263	0.700836	0.628912	-0.113378	-1.58412	0.742021	0.587945	0.783208	0.546978
			GOTEBORG-RINGON	1900	-	1958	-1.67445	±	0.198036	-1.57292	±	0.620613	0.797664	0.68448	-0.0490546	-3.00643	0.878613	0.603948	0.95956	0.523415
			TREGDE	1928	-	2005	0.125687	±	0.310695	0.0495967	±	0.331844	0.702726	0.48017	-0.155176	-0.978206	0.722461	0.460517	0.742196	0.440865
			SMOGEN	1911	-	2005	-2.00894	±	0.256708	-2.26874	±	0.834224	0.717383	0.637141	-0.136987	-3.48642	0.7516	0.603068	0.785818	0.568995
			STROMSTAD	1900	-	1967	-1.98194	±	0.135707	-1.87509	±	0.24164	0.618494	0.651946	-0.0650571	-3.08084	0.69088	0.579929	0.763266	0.507912
			STAVANGER	1919	-	2005	0.200977	±	0.300461	0.0201138	±	0.798415	0.629792	0.549177	-0.125771	-1.03319	0.650655	0.528415	0.671519	0.507655
			OSLO	1916	-	2005	-3.84692	±	0.52313	-4.39853	±	0.674128	0.690414	0.598054	-0.136768	-5.55033	0.72025	0.568321	0.750087	0.538587
			BERGEN	1916	-	2005	-0.252921	±	0.386133	-0.318349	±	0.628808	0.542909	0.509824	-0.137714	-1.2336	0.558138	0.494824	0.573366	0.479829
			MALOY	1944	-	2005	0.423737	±	0.452186	0.124013	±	0.489166	0.511488	0.451533	-0.154033	-0.684954	0.51189	0.45111	0.512292	0.450688
			ALESUND	1945	-	2005	0.780294	±	2.06406	0.388818	±	0.445788	0.515588	0.355413	-0.160264	-0.321916	0.514511	0.356488	0.513433	0.357563
			HEIMSJOEN	1928	-	2005	-1.63283	±	0.516528	-2.21194	±	0.688796	0.504545	0.378578	-0.15377	-2.94123	0.505796	0.377271	0.507047	0.375963
			KEY WEST	1913	-	2005	2.22166	±	0.790937	1.83287	±	0.490058	0.632146	0.810381	-0.146619	0.53697	0.726526	0.715997	0.820905	0.621614
			PORT ISABEL	1945	-	2005	3.76539	±	0.339716	2.66053	±	0.486164	0.642179	0.448007	-0.193525	1.76385	0.648539	0.441661	0.654898	0.435315
			ST. PETERSBURG	1947	-	2005	2.38818	±	0.307157	1.50923	±	0.442871	0.734603	0.345458	-0.159574	0.588746	0.737503	0.342558	0.740403	0.339658
			CEDAR KEY II	1939	-	2005	1.41274	±	0.596628	0.717392	±	1.10883	0.716425	0.481366	-0.123643	-0.356759	0.737354	0.46044	0.758283	0.439514
			GRAND ISLE	1947	-	2005	9.40354	±	0.181143	8.73004	±	0.373138	0.707148	0.388621	-0.139319	7.77359	0.710274	0.3855	0.713399	0.382378
			GALVESTON II, PIER 21, TX	1909	-	2005	6.45733	±	0.476146	6.23036	±	0.668673	0.598712	0.899603	-0.0712029	4.80329	0.695579	0.802691	0.792446	0.705778
			MAYPORT	1929	-	2000	2.35375	±	0.357395	2.02776	±	0.744251	0.685653	0.55856	-0.139222	0.92278	0.74002	0.504182	0.794388	0.449803
			PENSACOLA	1924	-	2005	2.16088	±	0.596091	1.59442	±	0.661892	0.621747	0.678733	-0.0982982	0.392247	0.685623	0.61485	0.749498	0.550967
			FERNANDINA BEACH	1900	-	2005	2.06739	±	0.307247	2.36475	±	0.963589	0.582658	0.953885	-0.0706694	0.898852	0.698363	0.838204	0.814069	0.722524
			FORT PULASKI	1935	-	2005	2.99096	±	0.486438	2.15867	±	0.686496	0.656427	0.456541	-0.0905909	1.1363	0.686087	0.426873	0.715747	0.397205
			ST. GEORGES / ESSO PIER (BERMUDA)	1933	-	2005	2.06522	±	0.455764	1.25084	±	0.720567	0.892412	0.655064	-0.216754	-0.0798547	0.922998	0.624447	0.953584	0.59383
			CHARLESTON I	1922	-	2005	3.19292	±	0.320384	2.57897	±	0.647727	0.664089	0.629136	-0.0884035	1.37415	0.729511	0.563715	0.794932	0.498294
			WILMINGTON	1936	-	2005	2.04926	±	0.40569	1.24015	±	0.738757	0.677663	0.417351	-0.109434	0.254588	0.704223	0.390769	0.730784	0.364188
			PORTSMOUTH (NORFOLK NAVY YARD)	1936	-	1986	3.71838	±	0.368668	2.74991	±	0.721484	0.275843	0.429828	-0.198941	2.24317	0.319297	0.386378	0.362751	0.342927
			SEWELLS POINT, HAMPTON ROADS	1928	-	2005	4.41378	±	0.329109	3.51425	±	0.55155	0.653662	0.437389	-0.103026	2.52622	0.698953	0.392102	0.744244	0.346815
			LEWES (BREAKWATER HARBOR)	1919	-	2005	3.13298	±	0.506512	2.73879	±	0.936934	0.759006	0.487275	-0.0569222	1.54947	0.804024	0.442212	0.849042	0.397148
			ANNAPOLIS (NAVAL ACADEMY)	1929	-	2005	3.49462	±	0.328195	3.23658	±	0.640564	0.713707	0.403638	-0.0714222	2.1907	0.756193	0.361108	0.798678	0.318578
			BALTIMORE	1903	-	2005	3.11226	±	0.319466	3.06382	±	0.527348	0.650917	0.858229	-0.0435332	1.59819	0.740238	0.768926	0.829558	0.679623
			ATLANTIC CITY	1912	-	2005	4.0346	±	0.235325	4.04656	±	0.359243	0.70429	0.81178	-0.0465223	2.57701	0.783018	0.73305	0.861745	0.65432
			PHILADELPHIA (PIER 9N)	1901	-	2005	2.74065	±	0.222924	2.50568	±	0.667047	0.638207	0.870081	-0.0434495	1.0408	0.72946	0.778863	0.820713	0.687644
			SANDY HOOK	1933	-	2005	3.87381	±	0.757151	3.91323	±	0.401655	0.887186	0.350115	-0.0653867	2.74132	0.917377	0.319918	0.947569	0.289722
			NEW YORK (THE BATTERY)	1900	-	2005	2.98421	±	0.766436	3.2153	±	0.727985	0.666374	0.909334	-0.0305443	1.67013	0.75839	0.817318	0.850405	0.725302
			WILLETS POINT	1932	-	1999	2.39999	±	0.443612	2.36612	±	0.48271	0.75372	0.39499	-0.088378	1.30578	0.792666	0.356048	0.831611	0.317105
			NEW LONDON	1939	-	2005	2.27268	±	0.184119	2.07814	±	0.357128	0.894573	0.248247	-0.0551318	0.990442	0.910007	0.232824	0.92544	0.217401
			NEWPORT	1931	-	2005	2.54225	±	0.905329	2.27631	±	2.1086	0.866674	0.374841	-0.0527441	1.08755	0.901126	0.340383	0.935577	0.305924
			PROVIDENCE (STATE PIER)	1939	-	2005	1.82969	±	0.266377	1.63985	±	0.383958	0.870042	0.288167	-0.0479857	0.529603	0.889765	0.268472	0.909489	0.248776
			HALIFAX	1920	-	2005	3.34137	±	1.83238	3.56537	±	0.607956	0.717949	0.595864	-0.0705506	2.32208	0.773801	0.54004	0.829654	0.484216
			KWAJALEIN	1947	-	2005	1.37073	±	0.728611	0.934587	±	1.53938	1.12801	0.454356	-0.417141	-0.230633	1.13214	0.45022	1.13628	0.446083
			HILO, HAWAII ISLAND	1927	-	2005	3.29992	±	0.190914	2.79267	±	0.309072	1.06489	0.69847	-0.361988	1.39135	1.12124	0.642069	1.1776	0.585668
			HONOLULU	1905	-	2005	1.48132	±	0.512092	1.34812	±	1.80142	0.74562	0.976572	-0.287318	-0.086679	0.875561	0.846554	1.0055	0.716537
			HOSOJIMA	1930	-	2005	-0.595168	±	1.45039	-1.02986	±	2.34965	0.768731	0.590541	-0.297402	-2.09174	0.822615	0.53666	0.876499	0.482778
			KAINAN	1953	-	2005	-1.80189	±	1.40751	-1.67122	±	2.34965	0.989772	0.201199	-0.320675	-2.54151	0.987838	0.203134	0.985903	0.205068
			TONOURA	1900	-	1983	0.308291	±	0.509264	0.60397	±	0.570416	0.453487	1.10615	-0.174904	-0.780783	0.627313	0.932343	0.80114	0.758538
			MERA	1931	-	2005	3.74216	±	0.558599	3.03578	±	2.57715	0.85304	0.513497	-0.301662	1.97088	0.90523	0.461324	0.957421	0.409152
			ABURATSUBO	1930	-	2005	3.40806	±	0.870895	3.18473	±	2.46198	0.820894	0.543342	-0.302717	2.1232	0.875684	0.488571	0.930474	0.433801
			ONAHAMA	1951	-	2005	-2.5411	±	0.204881	-3.18576	±	0.656549	1.01323	0.157312	-0.338405	-4.0179	1.01248	0.15807	1.01172	0.158827
			WAJIMA	1930	-	2005	-0.422303	±	0.119998	-0.376641	±	0.403659	0.710618	0.559464	-0.285902	-1.36083	0.762642	0.507447	0.814666	0.455429
			KUSHIRO	1947	-	2005	9.74512	±	0.362009	9.00243	±	1.00019	0.876573	0.289429	-0.332349	8.16878	0.880583	0.285419	0.884592	0.281408
			KABELVAG	1948	-	2005	-1.16671	±	0.103048	-1.75126	±	0.419577	0.475751	0.250755	-0.156935	-2.32084	0.474314	0.252202	0.472877	0.253648
			NARVIK	1929	-	2005	-2.40022	±	0.180335	-2.68787	±	0.426071	0.305187	0.217114	-0.151701	-3.05851	0.293136	0.229204	0.281084	0.241294
			MURMANSK	1952	-	2005	3.66751	±	0.109498	3.23851	±	0.4246	0.854277	0.441996	-0.145493	2.08776	0.853926	0.442316	0.853576	0.442636
			MURMANSK II	1952	-	2005	3.46909	±	0.173097	3.04009	±	0.403819	0.854277	0.441996	-0.145493	1.88934	0.853926	0.442316	0.853576	0.442636
			POLYARNIY	1926	-	1990	-1.54747	±	0.165138	-2.33011	±	0.429283	0.251464	0.377263	-0.188788	-2.77014	0.240997	0.387817	0.230531	0.398372
			TROMSO	1953	-	2005	-0.687206	±	0.132061	-1.0172	±	0.396152	0.538917	0.0938349	-0.147284	-1.50267	0.538302	0.0944477	0.537687	0.0950598
			AMDERMA	1950	-	2005	3.54002	±	0.193788	3.15217	±	0.546578	0.546828	0.136973	-0.189216	2.65762	0.547303	0.136457	0.547779	0.135941
			IZVESTIA TSIK (IZVESTIA TSIK OSTROVA)	1954	-	2005	0.168047	±	0.169152	0.275929	±	0.409284	0.568333	-0.121388	-0.209007	0.038021	0.569272	-0.122357	0.57021	-0.123325
			KOTELNYI (KOTELNYI OSTROV)	1951	-	2005	4.57952	±	0.139316	5.02515	±	0.515922	0.676445	0.234226	-0.270667	4.38516	0.676546	0.234117	0.676647	0.234009
			GOLOMIANYI (GOLOMIANYI OSTROV)	1954	-	2004	0.921499	±	0.115293	0.861974	±	0.405734	0.260595	-0.420563	-0.240484	1.26243	0.266607	-0.42658	0.272619	-0.432597

## Sheet: Table 2- ESL Changes
			Tide Gauge	Case 1					Case 2		Case 3
				Return period of what was a 1-in-100-year event in 1900 in the year 2005 due to MSL rise [yr]
				HIST	ANT	NAT	TWS	VLM	ANT	NAT	ANT	NAT
			QUEQUEN	-	-	-	-	-	-	-	-	-
			BUENOS AIRES	50	67	75	103	94	64	78	61	82
			TAKORADI	-	-	-	-	-	-	-	-	-
			LYTTELTON II	≤0.01	≤0.01	≤0.01	≤0.01	≤0.01	≤0.01	≤0.01	≤0.01	≤0.01
			WELLINGTON HARBOUR	0.52	3	4	238	34	2	6	2	9
			WELLINGTON II	0.57	3	4	238	46	2	6	2	9
			AUCKLAND II	-	-	-	-	-	-	-	-	-
			PORT ADELAIDE (OUTER HARBOR)	6	35	30	123	25	30	35	26	41
	≤		SYDNEY, FORT DENISON 2	4	4	6	198	6447	3	9	2	13
			SYDNEY, FORT DENISON	6	5	8	182	≥10000	4	10	3	15
			PORT PIRIE	36	47	42	115	130	42	47	38	53
			NEWCASTLE III	0.55	3	5	221	22	2	7	2	10
			FREMANTLE	31	22	24	127	415	19	29	15	36
			PAGO PAGO	0.2	0.77	0.51	7564	0.46	0.48	0.74	0.34	1
			KO TAPHAO NOI	25	12	8	217	≥10000	9	10	6	14
			COCHIN (WILLINGDON IS.)	-	-	-	-	-	-	-	-	-
			KO LAK	40	17	12	159	8316	13	15	10	20
			KO SICHANG	-	-	-	-	-	-	-	-	-
			LEGASPI, ALBAY	0.18	7	3	203	3	5	4	3	6
			FORT PHRACHULA CHOMKLAO (POM PHRACHUN)	-	-	-	-	-	-	-	-	-
			MANILA, S. HARBOR	0.29	15	9	158	0.29	12	12	10	17
			VISAKHAPATNAM	-	-	-	-	-	-	-	-	-
			MUMBAI / BOMBAY (APOLLO BANDAR)	-	-	-	-	-	-	-	-	-
			MACAU	-	-	-	-	-	-	-	-	-
			GARDEN REACH	0.3	54	52	120	0.64	48	59	42	67
			BALBOA	10	28	22	118	84	23	26	20	31
			SAN DIEGO (QUARANTINE STATION)	0.3	4	3	510	2	3	4	3	6
			LA JOLLA (SCRIPPS PIER)	0.23	3	2	1419	1	2	3	2	4
			LOS ANGELES	3	3	3	554	≥10000	3	4	2	6
			SANTA MONICA (MUNICIPAL PIER)	0.75	6	5	308	9	4	7	3	9
			PORT SAN LUIS	6	10	10	332	164	8	13	6	16
			ALAMEDA (NAVAL AIR STATION)	14	25	24	121	153	20	28	16	34
			SAN FRANCISCO	3	27	26	119	16	22	31	19	37
			CRESCENT CITY	200	33	36	106	2814	29	41	25	47
			ASTORIA (TONGUE POINT)	150	42	56	104	924	39	61	35	69
			SEATTLE	2	22	37	104	7	19	43	16	50
			NEAH BAY	≥10000	30	47	103	≥10000	27	52	24	60
			VICTORIA	26	35	52	103	144	31	57	28	64
			FRIDAY HARBOR (OCEAN. LABS.)	7	21	37	105	44	19	42	16	50
			TOFINO	731	43	63	103	≥10000	40	68	37	74
			VANCOUVER	22	23	38	104	358	20	44	17	51
			POINT ATKINSON	11	27	43	104	57	24	48	21	56
			PRINCE RUPERT	11	37	69	106	29	38	71	36	73
			KETCHIKAN	66	38	77	113	389	40	74	41	71
			SITKA	7142	75	175	109	5318	96	132	121	104
			JUNEAU	≥10000	81	150	107	≥10000	97	122	115	103
			YAKUTAT	≥10000	72	188	117	≥10000	101	130	144	98
			SANTA CRUZ DE TENERIFE I	-	-	-	-	-	-	-	-	-
			CEUTA	7	10	9	129	579	8	11	6	15
			TARIFA	6	6	5	145	≥10000	5	7	4	9
			LAGOS	-	-	-	-	-	-	-	-	-
			CASCAIS	-	-	-	-	-	-	-	-	-
			WOODS HOLE (OCEAN. INST.)	35	74	74	99	66	71	76	69	79
			VIGO	2	28	26	115	7	24	30	21	35
			BOSTON	8	43	51	94	36	41	55	36	60
			LA CORUNA I	0.94	13	12	135	5	11	15	9	18
			SANTANDER I	0.62	7	5	181	3	6	7	5	8
			PORTLAND (MAINE)	4	22	29	88	46	20	33	16	38
			EASTPORT	3	17	24	87	32	15	28	13	33
			SAINT JOHN, N.B.	-	-	-	-	-	-	-	-	-
			CHARLOTTETOWN	7	49	65	93	24	47	68	44	72
			BREST	2	15	15	138	12	13	18	11	21
			NEWLYN	2	18	22	125	6	16	25	14	29
			OOSTENDE	-	-	-	-	-	-	-	-	-
			VLISSINGEN	28	64	69	103	58	62	71	60	73
			SHEERNESS	9	47	49	106	29	45	52	42	56
			MAASSLUIS	23	52	56	105	65	49	59	47	62
			HOEK VAN HOLLAND	30	68	71	103	57	66	73	64	75
			IJMUIDEN	22	60	64	104	50	58	66	56	69
			DEN HELDER	44	68	71	103	84	66	74	64	76
			HARLINGEN	50	68	72	103	96	66	74	65	76
			HOLYHEAD	3	26	35	114	11	25	38	23	42
			DELFZIJL	57	78	82	102	87	76	83	75	85
			DUBLIN	-	-	-	-	-	-	-	-	-
			WEST-TERSCHELLING	54	64	68	103	117	62	70	60	72
			WISMAR 2	-	-	-	-	-	-	-	-	-
			TRAVEMUNDE	27	54	63	104	69	52	65	50	68
			KIEL-HOLTENAU	≤0.01	≤0.01	≤0.01	≤0.01	≤0.01	≤0.01	≤0.01	≤0.01	≤0.01
			GEDSER	39	46	55	105	138	44	58	42	62
			NORTH SHIELDS	11	41	50	107	39	39	53	37	55
			SLIPSHAVN	≤0.01	≤0.01	≤0.01	≤0.01	≤0.01	≤0.01	≤0.01	≤0.01	≤0.01
			KORSOR	≤0.01	≤0.01	≤0.01	≤0.01	≤0.01	≤0.01	≤0.01	≤0.01	≤0.01
			ESBJERG	62	67	76	102	118	65	78	64	80
			FREDERICIA	≤0.01	≤0.01	≤0.01	≤0.01	≤0.01	≤0.01	≤0.01	≤0.01	≤0.01
			HORNBAEK	124	45	59	102	580	43	61	42	63
			AARHUS	≤0.01	≤0.01	≤0.01	≤0.01	≤0.01	≤0.01	≤0.01	≤0.01	≤0.01
			VARBERG	493	35	50	103	8784	33	52	32	55
			ABERDEEN I	18	22	31	114	250	21	34	20	36
			ABERDEEN II	9	17	25	118	132	16	27	15	30
			FREDERIKSHAVN	-	-	-	-	-	-	-	-	-
			HIRTSHALS	-	-	-	-	-	-	-	-	-
			GOTEBORG-RINGON	-	-	-	-	-	-	-	-	-
			TREGDE	63	29	43	104	613	27	46	26	48
			SMOGEN	3846	35	50	103	≥10000	34	53	32	55
			STROMSTAD	≥10000	28	43	104	≥10000	27	45	26	48
			STAVANGER	62	22	37	102	1620	20	39	19	41
			OSLO	3987	52	66	102	≥10000	51	68	49	70
			BERGEN	147	26	40	104	3552	26	42	25	45
			MALOY	49	30	42	104	469	30	43	29	44
			ALESUND	53	47	59	103	190	46	59	46	59
			HEIMSJOEN	5947	41	52	102	≥10000	41	53	41	53
			KEY WEST	5	34	26	106	44	28	31	24	37
			PORT ISABEL	26	78	71	101	50	75	74	71	78
			ST. PETERSBURG	57	82	79	100	86	80	81	77	84
			CEDAR KEY II	74	85	79	99	109	82	82	80	84
			GRAND ISLE	56	94	91	100	66	93	92	92	93
			GALVESTON II, PIER 21, TX	38	92	88	100	49	90	89	89	91
			MAYPORT	2	26	20	97	16	21	24	17	30
			PENSACOLA	87	96	93	100	97	95	93	94	94
			FER-DINA BEACH	8	46	39	98	34	40	44	35	49
			FORT PULASKI	6	46	40	96	28	41	45	37	50
			ST. GEORGES / ESSO PIER (BERMUDA)	3	13	7	122	64	10	9	8	11
			CHARLESTON I	8	55	48	99	30	50	53	45	58
			WILMINGTON	29	61	57	99	82	57	61	53	66
			PORTSMOUTH (NORFOLK NAVY YARD)	-	-	-	-	-	-	-	-	-
			SEWELLS POINT, HAMPTON ROADS	17	71	72	100	34	68	75	66	78
			LEWES (BREAKWATER HARBOR)	15	62	64	98	39	58	67	54	71
			ANNAPOLIS (NAVAL ACADEMY)	20	72	74	99	41	69	77	66	79
			BALTIMORE	29	75	76	99	54	72	79	69	81
			ATLANTIC CITY	2	45	48	97	8	41	52	37	57
			PHILADELPHIA (PIER 9N)	10	49	51	97	38	44	55	41	60
			SANDY HOOK	15	72	72	98	30	69	75	66	78
			NEW YORK (THE BATTERY)	24	72	72	98	48	69	75	66	78
			WILLETS POINT	56	85	85	99	78	83	87	82	88
			NEW LONDON	44	79	79	99	73	77	81	75	83
			NEWPORT	9	48	48	96	35	44	52	41	56
			PROVIDENCE (STATE PIER)	42	74	73	98	79	71	76	68	78
			HALIFAX	1	36	43	97	6	33	47	29	52
			KWAJALEIN	0.15	0.55	0.73	≥10000	338	0.39	1	0.29	2
			HILO, HAWAII ISLAND	0.19	15	11	142	3	10	14	7	20
			HONOLULU	0.37	3	2	291	91	2	3	1	4
			HOSOJIMA	43	50	34	112	207	44	38	38	44
			KAI-	741	37	22	119	≥10000	30	26	25	32
			TONOURA	33	57	41	108	118	51	45	46	51
			MERA	5	61	44	108	20	55	49	49	55
			ABURATSUBO	0.26	31	15	123	2	24	19	19	25
			ONAHAMA	57	48	26	113	319	40	31	34	37
			WAJIMA	26	45	27	113	170	39	32	33	37
			KUSHIRO	0.15	35	17	122	0.15	29	21	23	26
			KABELVAG	7230	46	66	104	≥10000	47	63	49	61
			NARVIK	≥10000	53	77	102	≥10000	55	74	58	72
			MURMANSK	-	-	-	-	-	-	-	-	-
			MURMANSK II	-	-	-	-	-	-	-	-	-
			POLYARNIY	≥10000	35	48	105	≥10000	36	47	36	46
			TROMSO	-	-	-	-	-	-	-	-	-
			AMDERMA	2	52	48	109	4	52	49	53	48
			IZVESTIA TSIK (IZVESTIA TSIK OSTROVA)	29	41	65	114	270	43	62	45	61
			KOTELNYI (KOTELNYI OSTROV)	-	-	-	-	-	-	-	-	-
			GOLOMIANYI (GOLOMIANYI OSTROV)	-	-	-	-	-	-	-	-	-
